# Supplementary material
Source: ML conference proceedings conference paper supplement (https://openaccess.thecvf.com/content/CVPR2021/html/Tian_Farewell_to_Mutual_CVPR_2021_paper.html)
Supplement: Supplementary file 1 [file Tian_Farewell_to_Mutual_CVPR_2021_supplemental.pdf]

# Farewell to Mutual Information: Variational Distillation for Cross-Modal Person Re-Identification

## 1. Appendix

In this section, we introduce and prove the theorems mentioned in the main text of this paper.

### A. ON SUFFICIENCY

Consider  $x \in \mathbb{X}$  and  $y$  as the input data and the label, and let the  $v$  be an observation containing the same amount of predictive information regarding  $y$  as  $x$  does, and let  $z$  be the corresponding representation produced by an information bottleneck.

*Hypothesis:*

$(H_1)$   $v$  is sufficient for  $y$ , i.e.,  $I(v; y) = I(x; y)$

*Thesis:*

$(T_1)$   $\min I(v; y) - I(z; y) \iff \min H(y|z) - H(y|v)$

$(T_2)$  reducing  $D_{KL}[p(y|v)||p(y|z)]$  is consistent with preserving sufficiency of  $z$  for  $y$ .

*Proof.*

Based on the definition of mutual information [1]:

$$I(v; z) := H(v) - H(v|z), \quad (1)$$

where  $H(v)$  denotes Shannon entropy, and  $H(v|z)$  is the conditional entropy of  $v$  given  $z$  [1]. Based on the symmetry of mutual information, we have:

$$I(v; z) = I(z; v), \quad (2)$$

which indicates that the requirement of sufficiency is equivalent to:

$$\begin{aligned} I(v; y) = I(z; y) \\ \iff I(y; v) = I(y; z) \\ \iff H(y) - H(y|v) = H(y) - H(y|z) \\ \iff -H(y|v) = -H(y|z). \end{aligned} \quad (3)$$

Therefore, we have:

$$\min I(v; y) - I(z; y) \iff \min H(y|z) - H(y|v), \quad (4)$$

which proves  $(T_1)$ . Based on the definition of conditional entropy, for any continuous variables  $v, y$  and  $z$ , we have:

$$\begin{aligned} I(v; y) - I(z; y) &= H(y|z) - H(y|v) = \\ &= - \int p(z) dz \int p(y|z) \log p(y|z) dy \\ &+ \int p(v) dv \int p(y|v) \log p(y|v) dy = \\ &= - \iint p(z) p(y|z) \log \left[ \frac{p(y|z)}{p(y|v)} p(y|v) \right] dz dy \\ &+ \iint p(v) p(y|v) \log \left[ \frac{p(y|v)}{p(y|z)} p(y|z) \right] dv dy. \end{aligned} \quad (5)$$

By factorizing the double integrals in Eq. (5) into another two components, we show the following:

$$\begin{aligned} \iint p(z) p(y|z) \log \left[ \frac{p(y|z)}{p(y|v)} p(y|v) \right] dz dy = \\ \underbrace{\iint p(z) p(y|z) \log \frac{p(y|z)}{p(y|v)} dz dy}_{\text{term } Z_1} + \\ \underbrace{\iint p(z) p(y|z) \log p(y|v) dz dy}_{\text{term } Z_2}. \end{aligned} \quad (6)$$

Conduct similar factorization for the second term in Eq.(5), we have:

$$\begin{aligned} \iint p(v) p(y|v) \log \left[ \frac{p(y|v)}{p(y|z)} p(y|z) \right] dv dy = \\ \underbrace{\iint p(v) p(y|v) \log \frac{p(y|v)}{p(y|z)} dv dy}_{\text{term } V_1} + \\ \underbrace{\iint p(v) p(y|v) \log p(y|z) dv dy}_{\text{term } V_2}. \end{aligned} \quad (7)$$

Integrate term  $Z_1$  and term  $V_1$  over  $y$ :

$$Z_1 = \int p(z) D_{KL}[p(y|z)||p(y|v)] dz, \quad (8)$$

$$V_1 = \int p(v) D_{KL}[p(y|v)||p(y|z)] dv, \quad (9)$$

where  $D_{KL}$  denotes KL-divergence. Integrate term  $Z_2$  and term  $V_2$  over  $z$  and  $v$  respectively, we have:

$$Z_2 = \int p(y) \log p(y|v) dy. \quad (10)$$

$$V_2 = \int p(y) \log p(y|z) dy \quad (11)$$

In the view of above, we have the following:

$$\begin{aligned} I(v; y) - I(z; y) &= H(y|z) - H(y|v) = \\ &= \int p(v) D_{KL}[p(y|v)||p(y|z)] dv + \int p(y) \log \left[ \frac{p(y|z)}{p(y|v)} \right] dy \\ &\quad - \int p(z) D_{KL}[p(y|z)||p(y|v)] dz \end{aligned} \quad (12)$$

Based on the non-negativity of KL-divergence, Eq. (12) is upper bounded by:

$$\int p(v) D_{KL}[p(y|v)||p(y|z)] dv + \int p(y) \log \left[ \frac{p(y|z)}{p(y|v)} \right] dy. \quad (13)$$

Equivalently, we have the upper bound as:

$$\begin{aligned} &\mathbb{E}_{v \sim E_\theta(v|x)} \mathbb{E}_{z \sim E_\phi(z|v)} [D_{KL}[p(y|v)||p(y|z)]] \\ &+ \mathbb{E}_{v \sim E_\theta(v|x)} \mathbb{E}_{z \sim E_\phi(z|v)} \left[ \log \left[ \frac{p(y|z)}{p(y|v)} \right] \right], \end{aligned} \quad (14)$$

where  $\theta, \phi$  denote the parameters of the encoder and the information bottleneck. Therefore, the objective of preserving sufficiency of  $z$  for  $y$  can be formalized as:

$$\min_{\theta, \phi} \mathbb{E}_{v \sim E_\theta(v|x)} \mathbb{E}_{z \sim E_\phi(z|v)} \left[ D_{KL}[\mathbb{P}_v || \mathbb{P}_z] + \log \left[ \frac{\mathbb{P}_z}{\mathbb{P}_v} \right] \right], \quad (15)$$

in which  $\mathbb{P}_z = p(y|z)$  and  $\mathbb{P}_v = p(y|v)$  denote the predicted distributions of the representation and observation.

Clearly, the objective of preserving sufficiency is equivalent to minimize the discrepancy between the predicted distributions of  $v$  and  $z$ . Notice that this can be achieved by minimizing  $D_{KL}(\mathbb{P}_v || \mathbb{P}_z)$ , which can explicitly approximate  $p(y|z)$  to  $p(y|v)$  and implicitly reduce the second term in Eq.(15) in the same time. At the extreme, the representation  $z$  retrieves all label information contained in the sufficient observation  $v$ , indicating that  $z$  is sufficient for  $y$  as well. Formally, we have:

$$\lim_{\mathbb{P}_z \rightarrow \mathbb{P}_v} D_{KL}[\mathbb{P}_v || \mathbb{P}_z] + \int p(y) \log \left[ \frac{\mathbb{P}_v}{\mathbb{P}_z} \right] dy = 0 \quad (16)$$

Based on Eq. (12), we show the following:

$$\lim_{\mathbb{P}_z \rightarrow \mathbb{P}_v} I(v; y) - I(z; y) = \lim_{\mathbb{P}_z \rightarrow \mathbb{P}_v} H(y|v) - H(y|z) = 0 \quad (17)$$

which reveals that minimizing  $D_{KL}[\mathbb{P}_v || \mathbb{P}_z]$  is consistent with the objective of preserving sufficiency of the representation. Thus (T<sub>2</sub>) holds.

## B. ON CONSISTENCY

Consider  $v_1, v_2$  as two sufficient observations of the same objective  $x$  from different viewpoints or modals, and let  $y$  be the label. Let  $z_1, z_2$  be the corresponding representations obtained from an information bottleneck.

*Hypothesis:*

(H<sub>1</sub>) both  $v_1, v_2$  are sufficient for  $y$

(H<sub>2</sub>)  $z_1, z_2$  are in the same distribution

*Thesis:*

(T<sub>1</sub>) minimizing  $D_{KL}[p(y|v_2)||p(y|z_1)]$  is consistent with the objective of eliminating task-irrelevant information encoded in  $I(z_1; v_2)$ , and is able to preserve those predictive and view-consistent information, vice versa for  $D_{KL}[p(y|v_1)||p(y|z_2)]$  and  $I(z_2; v_1)$

(T<sub>2</sub>) minimizing  $D_{JS}[p(y|z_1)||p(y|z_2)]$  is consistent with the objective of elimination of view-specific information for both  $z_1$  and  $z_2$

(T<sub>3</sub>) performing VCD and VML can promote view-consistency between  $z_1$  and  $z_2$

*Proofs.*

By factorizing the mutual information between the data observation  $v_1$  and its representation  $z_1$ , we have:

$$I(v_1; z_1) = I(v_1; z_1|v_2) + I(z_1; v_2), \quad (18)$$

where  $I(z_1; v_2)$  and  $I(v_1; z_1|v_2)$  denote the view-consistent and view-specific information, respectively.

Furthermore, by using the chain rule of mutual information, which subdivides  $I(z_1; v_2)$  into two components (proofs could be found in [2]), we have:

$$I(z_1; v_2) = I(v_2; z_1|y) + I(z_1; y) \quad (19)$$

combining with Eq. (18), we show the following:

$$I(z_1; v_1) = \underbrace{I(v_1; z_1|v_2)}_{\text{view-specific}} + \underbrace{I(v_2; z_1|y)}_{\text{superfluous}} + \underbrace{I(z_1; y)}_{\text{predictive}}, \quad (20)$$

Based on Appendix A, reducing  $D_{KL}[\mathbb{P}_{v_2}||\mathbb{P}_{z_1}]$ , where  $\mathbb{P}_{z_1} = p(y|z_1), \mathbb{P}_{v_2} = p(y|v_2)$ , can minimize  $I(v_2; z_1|y)$  and maximize  $I(z_1; y)$  in the same time, thus we conclude that  $(T_1)$  holds.

Considering that  $z_1, z_2 \in \mathbb{Z}$ ,  $I(v_1; z_1|v_2)$  can be expressed as:

$$\begin{aligned} I(v_1; z_1|v_2) &= \mathbb{E}_{v_1, v_2 \sim E_\theta(v|x)} \mathbb{E}_{z_1, z_2 \sim E_\phi(z|v)} \left[ \log \frac{p(z_1|v_1)}{p(z_1|v_2)} \right] \\ &= \mathbb{E}_{v_1, v_2 \sim E_\theta(v|x)} \mathbb{E}_{z_1, z_2 \sim E_\phi(z|v)} \left[ \log \frac{p(z_1|v_1)p(z_2|v_2)}{p(z_2|v_2)p(z_1|v_2)} \right] \\ &= D_{KL}[p(z_1|v_1)||p(z_2|v_2)] - D_{KL}[p(z_2|v_1)||p(z_2|v_2)] \\ &\leq D_{KL}[p(z_1|v_1)||p(z_2|v_2)]. \end{aligned} \quad (21)$$

Notice this bound is tight whenever  $z_1$  and  $z_2$  produce consistent encodings [2], which can be assured by the proposed VCD and is visualized in the main body of this paper. On the other hand, since  $y$  is constant with respect to the parameters to be optimized, we utilize Eq. (22) to approximate Eq. (21):

$$\mathbb{E}_{v_1, v_2 \sim E_\theta(v|x)} \mathbb{E}_{z_1, z_2 \sim E_\phi(z|v)} [D_{KL}[\mathbb{P}_{z_1}||\mathbb{P}_{z_2}]], \quad (22)$$

in which  $\mathbb{P}_{z_1} = p(y|z_1)$  and  $\mathbb{P}_{z_2} = p(y|z_2)$  denote the predicted distributions. Based on the above analysis, we conclude that  $I(v_1; z_1|v_2)$  can be minimized by reducing  $D_{KL}[\mathbb{P}_{z_1}||\mathbb{P}_{z_2}]$ . Similarly, we introduce the following objective to minimize  $I(v_2; z_2|v_1)$ .

$$\mathbb{E}_{v_1, v_2 \sim E_\theta(v|x)} \mathbb{E}_{z_1, z_2 \sim E_\phi(z|v)} [D_{KL}[\mathbb{P}_{z_2}||\mathbb{P}_{z_1}]], \quad (23)$$

For simplicity, we apply Eq. (24) to eliminate the view-specific information for both  $z_1$  and  $z_2$ .

$$\min_{\theta, \phi} \mathbb{E}_{v_1, v_2 \sim E_\theta(v|x)} \mathbb{E}_{z_1, z_2 \sim E_\phi(z|v)} [D_{JS}[\mathbb{P}_{z_1}||\mathbb{P}_{z_2}]], \quad (24)$$

where  $D_{JS}$  denotes the Jensen-Shannon divergence. Thus  $(T_2)$  holds.

Finally, according to [2],  $I(z_1; y) = I(v_1 v_2; y)$  when the following hypotheses stand:  $z_1$  is a representation of  $v_1$  and  $I(y; z_1|v_1 v_2) = 0$ , both  $v_1$  and  $v_2$  are sufficient for  $y$ ,  $z_1$  is sufficient for  $v_2$ . As a consequence of data processing inequality, the amount of information encoded in  $z_1$  cannot be more than the joint observation, *i.e.*  $I(y; z_1|v_1 v_2) \equiv 0$ . Since sufficiency of  $v_1$  and  $v_2$  for  $y$  is consistent with the given task, it is widely adopted as an established assumption. Notably, sufficiency of  $z_1$  for  $v_2$  can be achieved by preserving view-consistent information while simultaneously eliminating the view-specific details, which correspond to the proposed VCD and VML, respectively. Therefore,  $(T_3)$  holds.

## References

[1] Mohamed Ishmael Belghazi, Aristide Baratin, Sai Rajeswar, Sherjil Ozair, Yoshua Bengio, R. Devon Hjelm, and Aaron C.

Courville. Mutual information neural estimation. In *ICML*, 2018. 1

[2] Marco Federici, Anjan Dutta, Patrick Forré, Nate Kushman, and Zeynep Akata. Learning robust representations via multi-view information bottleneck. In *ICLR*, 2020. 2, 3
